# Supplementary material for: Effects of thermophilic composting on oxytetracycline, sulfamethazine, and their corresponding resistance genes in swine manure
Source: Royal Society of Chemistry journal article supplement (doi:10.1039/c5em00132c), 2015-01-01
Supplement: c5em00132c1.pdf [file c5em00132c1.pdf]

## Supplementary Information

### Manuscript title:

Effects of thermophilic composting on oxytetracycline, sulfamethazine, and corresponding resistance genes in swine manure

### Authors:

Jian Wang, Weiwei Ben, Yu Zhang, Min Yang, Zhimin Qiang\*

*Key Laboratory of Drinking Water Science and Technology, Research Center for Eco-Environmental Sciences, Chinese Academy of Sciences, 18 Shuang-qing Road, Beijing 100085, China*

\*Corresponding author. Tel.: +86 10 62849632; fax: +86 10 62923541.

E-mail address: [qiangz@rcees.ac.cn](mailto:qiangz@rcees.ac.cn) (Z. Qiang).

### List of supplementary materials:

| Material | Title                                                                                                              | Page |
|----------|--------------------------------------------------------------------------------------------------------------------|------|
| Table S1 | PCR primers for target ARGs, integrase genes, and 16S rDNA gene                                                    | S2   |
| Table S2 | q-PCR conditions                                                                                                   | S3   |
| Table S3 | Relative abundances of target ARGs and integrase genes in the control and AS (gene copies per 16S rDNA gene)       | S4   |
| Table S4 | Absolute abundances of target ARGs, integrase genes, and 16S rDNA in the control and AS (gene copies per gram, fw) | S6   |

**Table S1** PCR primers for target ARGs, integrase genes, and 16S rDNA gene

| Category              | Target ARG            | Primer                                                            | Sequence (5'-3')         | Reference |
|-----------------------|-----------------------|-------------------------------------------------------------------|--------------------------|-----------|
| EFP TRGs              | <i>tetA</i>           | <i>tetA</i> -F                                                    | GCTACATCCTGCTTGCCTTC     | 1         |
|                       |                       | <i>tetA</i> -R                                                    | CATAGATCGCCGTGAAGAGG     |           |
|                       | <i>tetC</i>           | <i>tetC</i> -F                                                    | CTTGAGAGCCTTCAACCCAG     | 1         |
|                       |                       | <i>tetC</i> -R                                                    | ATGGTCGTCATCTACCTGCC     |           |
|                       | <i>tetG</i>           | <i>tetG</i> -F                                                    | GCTCGGTGGTATCTCTGCTC     | 1         |
|                       |                       | <i>tetG</i> -R                                                    | AGCAACAGAATCGGGAACAC     |           |
|                       | <i>tetL</i>           | <i>tetL</i> -F                                                    | TCGTTAGCGTGCTGTCATTC     | 1         |
|                       |                       | <i>tetL</i> -R                                                    | GTATCCCACCAATGTAGCCG     |           |
| EI TRGs               | <i>tetX</i>           | <i>tetX</i> -F                                                    | CAATAATTGGTGGTGGACCC     | 1         |
|                       |                       | <i>tetX</i> -R                                                    | TTCTTACCTTGGACATCCCG     |           |
| RPP TRGs              | <i>tetM</i>           | <i>tetM</i> -F                                                    | ACAGAAAGCTTATTATATAAC    | 2         |
|                       |                       | <i>tetM</i> -R                                                    | TGGCGTGTCTATGATGTTTAC    |           |
|                       | <i>tetO</i>           | <i>tetO</i> -F                                                    | ACGGARAGTTTATTGTATACC    | 2         |
|                       |                       | <i>tetO</i> -R                                                    | TGGCGTATCTATAATGTTGAC    |           |
|                       | <i>tetQ</i>           | <i>tetQ</i> -F                                                    | AGAATCTGCTGTTTGCCAGTG    | 2         |
|                       |                       | <i>tetQ</i> -R                                                    | CGGAGTGTCAATGATATTGCA    |           |
|                       | <i>tetW</i>           | <i>tetW</i> -F                                                    | GAGAGCCTGCTATATGCCAGC    | 2         |
|                       |                       | <i>tetW</i> -R                                                    | GGGCGTATCCACAATGTTAAC    |           |
| SRGs                  | <i>sul1</i>           | <i>Sul1q</i> -F                                                   | CACCGGAAACATCGCTGCA      | 3         |
|                       |                       | <i>Sul1q</i> -R                                                   | AAGTTCCGCCGCAAGGCT       |           |
|                       | <i>sul2</i>           | <i>Sul2q</i> -F                                                   | CTCCGATGGAGGCCGGTAT      | 3         |
|                       |                       | <i>Sul2q</i> -R                                                   | GGGAATGCCATCTGCCTTGA     |           |
| Integrans             | <i>int11</i>          | C1q-786F                                                          | GGGTCAAGGATCTGGATTTTCG   | 4         |
|                       |                       | C1q-303R                                                          | ACATGCGTGTAATCATCGTCG    |           |
|                       | <i>int12</i>          | C2q-F                                                             | GTTATTTTATTGCTGGGATTAGGC | 3         |
|                       |                       | C2q-R                                                             | TTTTACGCTGCTGTATGGTGC    |           |
|                       | 16S rDNA <sup>a</sup> | 16Sq-F                                                            | CCTACGGGAGGCAGCAG        | 5         |
|                       |                       | 16Sq-R                                                            | TTACCGCGGCTGCTGGCAC      |           |
| 16S rDNA <sup>b</sup> | F984-GC               | CGCCCGGGGCGCGCCCCGGGCG<br>GGGCGGGGGCACGGGGGG-<br>AACCGAAGAACCTTAC | 6                        |           |
|                       | R1378                 | CGGTGTGTACAAGGCCCGGGAACG                                          |                          |           |

<sup>a</sup> Primer pair used for q-PCR. <sup>b</sup> Primer pair used for PCR-DGGE.

**Table S2** q-PCR conditions

| Target gene  | Annealing | Extending and  |      | Amplification  | Limit of detection |
|--------------|-----------|----------------|------|----------------|--------------------|
|              | (s)       | detection (s)  |      |                |                    |
|              | 55°C      | 60°C           | 72°C | efficiency (%) | (gene copy number) |
| <i>tetC</i>  | 20        | – <sup>a</sup> | 45   | 105.6          | 1000               |
| <i>tetG</i>  | 20        | –              | 45   | 100.4          | 10                 |
| <i>tetO</i>  | 20        | –              | 45   | 99.7           | 1000               |
| <i>sul2</i>  | 20        | –              | 45   | 102.2          | 100                |
| <i>intI1</i> | 20        | –              | 45   | 103.8          | 100                |
| <i>intI2</i> | 20        | –              | 45   | 99.4           | 30                 |
| <i>tetA</i>  | –         | 45             | –    | 109.7          | 100                |
| <i>tetQ</i>  | –         | 45             | –    | 105.3          | 100                |
| <i>tetW</i>  | –         | 45             | –    | 104.3          | 10                 |
| <i>tetX</i>  | –         | 45             | –    | 101.6          | 350                |
| 16S rDNA     | –         | 45             | –    | 104.4          | 5000               |
| <i>sul1</i>  | –         | 45             | –    | 105.9          | 100                |
| <i>tetL</i>  | 10        | –              | 31   | 105.3          | 50                 |
| <i>tetM</i>  | 10        | –              | 31   | 109.9          | 10                 |

<sup>a</sup> This step was not adopted.

**Table S3** Relative abundances of target ARGs and integrase genes in the control and AS (gene copies per 16S rDNA gene)

| Day            | <i>tetM</i>             | <i>tetO</i> | <i>tetQ</i> | <i>tetW</i> | <i>tetA</i> | <i>tetC</i> | <i>tetG</i> | <i>tetL</i> | <i>tetX</i> | <i>intI1</i> | <i>intI2</i> | <i>sul1</i> | <i>sul2</i> |
|----------------|-------------------------|-------------|-------------|-------------|-------------|-------------|-------------|-------------|-------------|--------------|--------------|-------------|-------------|
| 0 <sup>a</sup> | 4.32E-03 <sup>b</sup>   | 6.78E-02    | 2.14E-03    | 7.35E-03    | 1.33E-03    | 8.44E-05    | 7.89E-05    | 9.28E-03    | 1.40E-03    | 7.70E-04     | 8.08E-05     | 8.20E-03    | 3.57E-04    |
|                | (4.12E-04) <sup>b</sup> | (2.17E-03)  | (4.27E-04)  | (5.82E-05)  | (4.10E-05)  | (4.56E-06)  | (5.29E-06)  | (1.70E-04)  | (1.88E-05)  | (2.90E-05)   | (5.42E-06)   | (1.06E-03)  | (7.90E-05)  |
| <b>Control</b> |                         |             |             |             |             |             |             |             |             |              |              |             |             |
| 1              | 7.17E-03                | 4.67E-02    | 1.09E-03    | 4.74E-03    | 2.82E-02    | 3.58E-03    | 9.54E-03    | 6.34E-03    | 7.43E-04    | 2.36E-02     | 3.41E-03     | 2.48E-02    | 2.68E-02    |
|                | (3.94E-03)              | (2.86E-02)  | (1.61E-04)  | (7.13E-04)  | (1.81E-02)  | (1.94E-03)  | (8.95E-03)  | (2.70E-03)  | (2.81E-04)  | (1.36E-02)   | (3.14E-03)   | (8.38E-04)  | (2.12E-02)  |
| 3              | 5.34E-03                | 7.53E-02    | 4.52E-04    | 2.56E-03    | 5.60E-03    | 2.32E-03    | 5.92E-03    | 7.04E-03    | 2.75E-04    | 9.15E-03     | 5.24E-03     | 1.04E-02    | 8.49E-03    |
|                | (5.34E-04)              | (6.40E-04)  | (1.60E-04)  | (3.53E-04)  | (1.72E-03)  | (8.81E-04)  | (3.01E-05)  | (4.39E-05)  | (9.59E-05)  | (1.44E-03)   | (9.93E-04)   | (1.46E-03)  | (3.79E-05)  |
| 7              | 5.91E-03                | 1.36E-02    | 1.90E-02    | 8.75E-04    | 8.56E-03    | 9.12E-03    | 2.10E-02    | 3.85E-03    | 2.01E-03    | 2.41E-03     | 9.19E-04     | 4.07E-03    | 2.23E-03    |
|                | (3.55E-03)              | (1.13E-03)  | (7.21E-03)  | (5.63E-04)  | (3.29E-04)  | (1.20E-02)  | (2.70E-02)  | (3.75E-04)  | (2.13E-03)  | (1.07E-03)   | (7.58E-04)   | (1.37E-04)  | (3.89E-04)  |
| 12             | 2.38E-03                | 5.21E-02    | 9.25E-07    | 5.28E-04    | 2.47E-03    | 2.50E-04    | 3.06E-02    | 5.62E-03    | 1.68E-02    | 8.50E-03     | 2.64E-03     | 3.08E-02    | 4.58E-02    |
|                | (3.83E-04)              | (4.00E-04)  | (2.14E-07)  | (7.69E-05)  | (2.23E-04)  | (1.94E-04)  | (2.90E-03)  | (5.57E-04)  | (3.90E-03)  | (7.52E-04)   | (2.28E-03)   | (6.71E-05)  | (2.43E-03)  |
| 18             | 1.13E-03                | 2.71E-02    | 1.28E-06    | 2.66E-04    | 1.40E-03    | 4.94E-04    | 1.07E-01    | 5.87E-03    | 6.58E-02    | 2.09E-02     | 2.19E-02     | 7.20E-02    | 1.55E-01    |
|                | (3.57E-04)              | (6.41E-03)  | (1.79E-07)  | (6.69E-05)  | (1.54E-05)  | (2.41E-04)  | (5.51E-03)  | (1.43E-03)  | (4.29E-03)  | (1.44E-03)   | (2.00E-03)   | (3.26E-03)  | (1.51E-02)  |
| 25             | 9.48E-04                | 5.53E-02    | 1.34E-06    | 2.10E-04    | 1.21E-03    | 9.28E-04    | 1.49E-01    | 4.88E-03    | 4.78E-02    | 2.02E-02     | 1.40E-02     | 1.52E-01    | 2.04E-01    |
|                | (5.03E-05)              | (3.68E-03)  | (8.11E-07)  | (2.18E-05)  | (2.91E-04)  | (5.27E-04)  | (1.79E-02)  | (2.48E-04)  | (1.41E-02)  | (3.80E-04)   | (3.66E-03)   | (5.07E-03)  | (1.77E-02)  |
| 32             | 1.33E-03                | 4.56E-02    | 7.60E-07    | 1.64E-04    | 1.11E-03    | 3.90E-04    | 1.50E-01    | 4.38E-03    | 2.59E-02    | 1.78E-02     | 6.18E-03     | 1.35E-01    | 2.02E-01    |
|                | (5.88E-05)              | (2.55E-03)  | (2.38E-07)  | (7.41E-06)  | (6.23E-05)  | (3.08E-05)  | (1.47E-02)  | (6.64E-04)  | (4.04E-03)  | (3.42E-03)   | (2.41E-03)   | (1.62E-02)  | (8.42E-02)  |
| <b>AS</b>      |                         |             |             |             |             |             |             |             |             |              |              |             |             |
| 1              | 8.59E-03                | 6.11E-02    | 1.19E-02    | 8.61E-03    | 2.54E-02    | 1.95E-04    | 4.59E-04    | 6.60E-03    | 8.44E-04    | 7.35E-03     | 4.77E-04     | 7.29E-03    | 4.85E-03    |
|                | (7.66E-03)              | (5.09E-02)  | (1.28E-02)  | (7.24E-04)  | (2.72E-02)  | (1.03E-04)  | (2.92E-04)  | (3.23E-03)  | (5.18E-05)  | (3.90E-03)   | (3.27E-04)   | (2.26E-03)  | (3.22E-03)  |
| 3              | 1.01E-02                | 1.12E-01    | 6.83E-04    | 5.49E-03    | 1.80E-02    | 5.14E-04    | 2.47E-02    | 1.52E-02    | 9.11E-04    | 1.30E-02     | 6.61E-03     | 2.48E-02    | 5.85E-03    |
|                | (2.46E-03)              | (1.81E-02)  | (9.63E-05)  | (4.01E-04)  | (1.91E-04)  | (2.01E-04)  | (1.18E-03)  | (1.34E-03)  | (3.91E-05)  | (1.16E-03)   | (5.01E-04)   | (2.75E-03)  | (3.65E-04)  |
| 7              | 3.67E-03                | 1.02E-01    | 8.39E-06    | 2.43E-03    | 1.58E-02    | 1.07E-03    | 6.60E-02    | 2.40E-02    | 5.55E-03    | 2.71E-02     | 2.58E-04     | 5.14E-02    | 6.60E-03    |

|    |            |            |            |            |            |            |            |            |            |            |            |            |            |
|----|------------|------------|------------|------------|------------|------------|------------|------------|------------|------------|------------|------------|------------|
|    | (1.71E-04) | (7.26E-03) | (6.33E-07) | (2.89E-04) | (3.62E-03) | (2.28E-04) | (3.03E-03) | (3.27E-03) | (1.11E-03) | (1.57E-03) | (2.22E-05) | (4.63E-03) | (6.66E-04) |
| 12 | 3.78E-03   | 1.03E-01   | 2.14E-06   | 1.67E-03   | 3.29E-02   | 5.01E-03   | 1.74E-01   | 1.18E-02   | 8.44E-02   | 5.80E-02   | 3.77E-03   | 1.37E-01   | 1.21E-01   |
|    | (8.05E-04) | (2.88E-02) | (6.34E-07) | (1.74E-04) | (1.46E-03) | (3.44E-03) | (6.50E-02) | (4.03E-03) | (2.74E-03) | (1.45E-02) | (3.06E-03) | (7.16E-03) | (3.91E-02) |
| 18 | 2.07E-03   | 5.10E-02   | 1.07E-06   | 4.76E-04   | 4.83E-02   | 6.29E-03   | 3.54E-01   | 1.50E-02   | 3.81E-01   | 8.06E-02   | 2.27E-02   | 2.40E-01   | 4.13E-01   |
|    | (4.78E-04) | (1.33E-02) | (1.86E-07) | (8.69E-05) | (7.08E-03) | (1.24E-03) | (2.83E-03) | (1.53E-03) | (2.73E-04) | (2.44E-02) | (7.13E-04) | (5.39E-02) | (6.07E-02) |
| 25 | 9.01E-04   | 6.16E-02   | 1.86E-06   | 3.30E-04   | 4.10E-02   | 4.06E-03   | 4.03E-01   | 1.07E-02   | 1.99E-01   | 5.76E-02   | 1.59E-02   | 2.77E-01   | 3.53E-01   |
|    | (1.01E-04) | (2.88E-03) | (5.60E-07) | (1.70E-05) | (1.68E-03) | (9.45E-04) | (6.96E-02) | (1.70E-04) | (2.35E-02) | (1.21E-02) | (2.54E-03) | (1.04E-01) | (9.58E-03) |
| 32 | 9.36E-04   | 4.88E-02   | 7.05E-07   | 2.32E-04   | 3.17E-02   | 4.92E-03   | 3.01E-01   | 8.43E-03   | 1.61E-01   | 4.34E-02   | 1.34E-02   | 2.07E-01   | 2.82E-01   |
|    | (8.56E-04) | (3.35E-02) | (6.70E-07) | (1.00E-04) | (1.47E-02) | (2.63E-03) | (2.60E-01) | (3.93E-03) | (8.62E-02) | (2.39E-02) | (1.37E-02) | (2.07E-02) | (1.66E-01) |

<sup>a</sup> The data on Day 0 represent the initial relative abundances of target ARGs and integrase genes for both the control and AS. <sup>b</sup> Mean (standard deviation),  $n = 3$ .

---

**Table S4** Absolute abundances of target ARGs, integrase genes, and 16S rDNA in the control and AS (gene copies per gram, fw)

| Day            | <i>tetM</i>             | <i>tetO</i> | <i>tetQ</i> | <i>tetW</i> | <i>tetA</i> | <i>tetC</i> | <i>tetG</i> | <i>tetL</i> | <i>tetX</i> | <i>intI1</i> | <i>intI2</i> | <i>sul1</i> | <i>sul2</i> | 16S rDNA   |
|----------------|-------------------------|-------------|-------------|-------------|-------------|-------------|-------------|-------------|-------------|--------------|--------------|-------------|-------------|------------|
| 0 <sup>a</sup> | 2.19E+09 <sup>b</sup>   | 3.40E+10    | 1.04E+09    | 3.67E+09    | 6.61E+08    | 4.19E+07    | 3.97E+07    | 4.63E+09    | 7.01E+08    | 3.87E+08     | 4.01E+07     | 4.16E+09    | 1.74E+08    | 5.00E+11   |
|                | (7.19E+08) <sup>b</sup> | (9.13E+09)  | (4.02E+07)  | (9.01E+08)  | (1.37E+08)  | (7.73E+06)  | (1.20E+07)  | (1.02E+09)  | (1.57E+08)  | (1.06E+08)   | (6.88E+06)   | (1.50E+09)  | (2.82E+06)  | (1.19E+11) |
| <b>Control</b> |                         |             |             |             |             |             |             |             |             |              |              |             |             |            |
| 1              | 6.79E+09                | 4.41E+10    | 1.07E+09    | 4.57E+09    | 2.65E+10    | 3.39E+09    | 8.86E+09    | 6.04E+09    | 7.09E+08    | 2.24E+10     | 3.17E+09     | 2.41E+10    | 2.51E+10    | 9.71E+11   |
|                | (3.19E+09)              | (2.37E+10)  | (2.52E+08)  | (2.75E+08)  | (1.51E+10)  | (1.56E+09)  | (7.84E+09)  | (2.06E+09)  | (2.07E+08)  | (1.11E+10)   | (2.75E+09)   | (1.37E+09)  | (1.82E+10)  | (8.80E+10) |
| 3              | 2.06E+09                | 2.93E+10    | 1.81E+08    | 1.01E+09    | 2.23E+09    | 9.31E+08    | 2.31E+09    | 2.74E+09    | 1.10E+08    | 3.52E+09     | 2.07E+09     | 4.08E+09    | 3.30E+09    | 5.84E+11   |
|                | (1.25E+08)              | (4.44E+09)  | (9.02E+07)  | (2.96E+08)  | (1.02E+09)  | (4.87E+08)  | (3.80E+08)  | (4.55E+08)  | (5.44E+07)  | (8.90E+06)   | (7.13E+08)   | (1.21E+09)  | (5.43E+08)  | (9.33E+10) |
| 7              | 4.81E+09                | 1.12E+10    | 1.58E+10    | 7.11E+08    | 7.05E+09    | 7.31E+09    | 1.69E+10    | 3.17E+09    | 1.62E+09    | 1.97E+09     | 7.69E+08     | 3.35E+09    | 1.83E+09    | 1.24E+12   |
|                | (2.73E+09)              | (4.85E+08)  | (6.56E+09)  | (4.35E+08)  | (9.97E+06)  | (9.58E+09)  | (2.16E+10)  | (1.82E+08)  | (1.69E+09)  | (8.06E+08)   | (6.55E+08)   | (2.04E+07)  | (2.48E+08)  | (4.91E+10) |
| 12             | 5.55E+08                | 1.22E+10    | 2.15E+05    | 1.23E+08    | 5.76E+08    | 5.68E+07    | 7.19E+09    | 1.31E+09    | 3.90E+09    | 2.00E+09     | 6.38E+08     | 7.21E+09    | 1.07E+10    | 3.51E+11   |
|                | (5.01E+07)              | (7.73E+08)  | (3.47E+04)  | (9.23E+06)  | (1.10E+07)  | (4.12E+07)  | (1.19E+09)  | (3.68E+07)  | (6.33E+08)  | (3.17E+08)   | (5.78E+08)   | (4.97E+08)  | (1.93E+08)  | (2.50E+10) |
| 18             | 1.14E+08                | 2.74E+09    | 1.29E+05    | 2.69E+07    | 1.42E+08    | 4.95E+07    | 1.08E+10    | 5.95E+08    | 6.64E+09    | 2.11E+09     | 2.22E+09     | 7.26E+09    | 1.57E+10    | 1.51E+11   |
|                | (3.96E+07)              | (7.33E+08)  | (1.40E+04)  | (7.59E+06)  | (6.02E+06)  | (2.27E+07)  | (2.15E+08)  | (1.63E+08)  | (2.24E+08)  | (7.90E+07)   | (2.72E+08)   | (9.99E+07)  | (2.02E+09)  | (4.77E+09) |
| 25             | 2.15E+08                | 1.26E+10    | 2.99E+05    | 4.78E+07    | 2.77E+08    | 2.08E+08    | 3.39E+10    | 1.11E+09    | 1.09E+10    | 4.58E+09     | 3.19E+09     | 3.45E+10    | 4.64E+10    | 2.27E+11   |
|                | (2.08E+06)              | (1.38E+09)  | (1.71E+05)  | (7.01E+06)  | (7.81E+07)  | (1.11E+08)  | (5.52E+09)  | (1.04E+08)  | (3.66E+09)  | (1.13E+08)   | (9.68E+08)   | (2.65E+09)  | (6.03E+09)  | (9.85E+09) |
| 32             | 2.92E+08                | 1.01E+10    | 1.62E+05    | 3.63E+07    | 2.44E+08    | 8.51E+07    | 3.26E+10    | 9.49E+08    | 5.60E+09    | 3.84E+09     | 1.41E+09     | 2.94E+10    | 4.26E+10    | 2.20E+11   |
|                | (4.56E+07)              | (2.56E+09)  | (1.90E+04)  | (8.83E+06)  | (3.52E+07)  | (1.03E+07)  | (3.34E+09)  | (4.60E+07)  | (2.45E+08)  | (2.84E+07)   | (8.01E+08)   | (2.39E+09)  | (9.65E+09)  | (4.39E+10) |
| <b>AS</b>      |                         |             |             |             |             |             |             |             |             |              |              |             |             |            |
| 1              | 5.64E+09                | 4.05E+10    | 7.62E+09    | 6.29E+09    | 2.13E+10    | 1.35E+08    | 3.12E+08    | 4.57E+09    | 6.28E+08    | 5.07E+09     | 3.23E+08     | 5.18E+09    | 3.28E+09    | 7.38E+11   |
|                | (4.08E+09)              | (2.64E+10)  | (7.27E+09)  | (1.04E+09)  | (2.48E+10)  | (4.06E+07)  | (1.32E+08)  | (1.18E+09)  | (1.92E+08)  | (1.54E+09)   | (1.54E+08)   | (3.37E+08)  | (1.49E+09)  | (1.83E+11) |
| 3              | 4.34E+09                | 4.75E+10    | 2.90E+08    | 2.31E+09    | 7.49E+09    | 2.24E+08    | 1.02E+10    | 6.29E+09    | 3.78E+08    | 5.36E+09     | 2.78E+09     | 1.05E+10    | 2.46E+09    | 4.17E+11   |
|                | (1.98E+09)              | (1.81E+10)  | (1.04E+08)  | (6.83E+08)  | (1.61E+09)  | (1.32E+08)  | (1.82E+09)  | (8.73E+08)  | (6.92E+07)  | (7.37E+08)   | (8.30E+08)   | (3.47E+09)  | (7.02E+08)  | (9.40E+10) |
| 7              | 1.44E+09                | 3.99E+10    | 3.25E+06    | 9.56E+08    | 6.05E+09    | 4.10E+08    | 2.57E+10    | 9.26E+09    | 2.14E+09    | 1.05E+10     | 9.99E+07     | 1.99E+10    | 2.56E+09    | 3.90E+11   |

|    |            |            |            |            |            |            |            |            |            |            |            |            |            |            |
|----|------------|------------|------------|------------|------------|------------|------------|------------|------------|------------|------------|------------|------------|------------|
|    | (2.64E+08) | (8.29E+09) | (2.03E+05) | (2.43E+08) | (5.68E+08) | (3.18E+07) | (2.36E+09) | (1.14E+07) | (1.36E+08) | (8.43E+08) | (5.16E+06) | (9.53E+08) | (9.43E+07) | (5.36E+10) |
| 12 | 1.15E+09   | 3.15E+10   | 6.54E+05   | 5.05E+08   | 9.95E+09   | 1.56E+09   | 5.35E+10   | 3.62E+09   | 2.55E+10   | 1.77E+10   | 1.18E+09   | 4.14E+10   | 3.72E+10   | 3.01E+11   |
|    | (3.59E+08) | (1.18E+10) | (2.57E+05) | (1.04E+08) | (1.45E+09) | (1.19E+09) | (2.49E+10) | (1.58E+09) | (3.42E+09) | (6.16E+09) | (1.04E+09) | (6.37E+09) | (1.55E+10) | (3.07E+10) |
| 18 | 3.43E+08   | 8.46E+09   | 1.78E+05   | 7.91E+07   | 8.03E+09   | 1.05E+09   | 5.90E+10   | 2.50E+09   | 6.35E+10   | 1.34E+10   | 3.79E+09   | 3.97E+10   | 6.86E+10   | 1.67E+11   |
|    | (6.44E+07) | (1.83E+09) | (2.31E+04) | (1.10E+07) | (8.26E+08) | (2.53E+08) | (3.07E+09) | (1.45E+08) | (2.75E+09) | (3.48E+09) | (4.84E+07) | (7.22E+09) | (7.09E+09) | (7.35E+09) |
| 25 | 1.59E+08   | 1.09E+10   | 3.27E+05   | 5.83E+07   | 7.25E+09   | 7.19E+08   | 7.15E+10   | 1.90E+09   | 3.52E+10   | 1.01E+10   | 2.80E+09   | 4.93E+10   | 6.24E+10   | 1.77E+11   |
|    | (1.36E+07) | (2.18E+08) | (9.02E+04) | (1.45E+06) | (4.90E+08) | (1.86E+08) | (1.42E+10) | (2.08E+07) | (5.08E+09) | (1.86E+09) | (3.74E+08) | (1.97E+10) | (3.36E+09) | (4.72E+09) |
| 32 | 1.73E+08   | 9.03E+09   | 1.31E+05   | 4.30E+07   | 5.86E+09   | 9.11E+08   | 5.57E+10   | 1.56E+09   | 2.98E+10   | 8.04E+09   | 2.48E+09   | 3.83E+10   | 5.22E+10   | 1.85E+11   |
|    | (1.59E+08) | (6.22E+09) | (1.24E+05) | (1.87E+07) | (2.74E+09) | (4.89E+08) | (4.83E+10) | (7.32E+08) | (1.61E+10) | (4.45E+09) | (2.54E+09) | (3.96E+09) | (3.08E+10) | (6.62E+08) |

<sup>a</sup> The data on Day 0 represent the initial absolute abundances of target ARGs and integrase genes for both the control and AS. <sup>b</sup> Mean (standard deviation),  $n = 3$ .

---

## References

1. L. K. Ng, I. Martin, M. Alfa and M. Mulvey, *Mol. Cell. Probe*, 2001, **15**, 209–215.
2. R. I. Aminov, N. Garrigues-Jeanjean and R. I. Mackie, *Appl. Environ. Microbiol.*, 2001, **67**, 22–32.
3. Y. Luo, D. Q. Mao, M. Rysz, Q. X. Zhou, H. J. Zhang, L. Xu and P. J. J. Alvarez, *Environ. Sci. Technol.*, 2010, **44**, 7220–7225.
4. D. Mazel, B. Dychinco, V. A. Webb and J. Davies, *Antimicrob. Agents Chemother.*, 2000, **44**, 1568–1574.
5. S. Koike, I. G. Krapac, H. D. Oliver, A. C. Yannarell, J. C. Chee-Sanford, R. I. Aminov and R. I. Mackie, *Appl. Environ. Microbiol.*, 2007, **73**, 4813–4823.
6. H. Heuer, M. Krsek, P. Baker, K. Smalla and E. M. Wellington, *Appl. Environ. Microbiol.*, 1997, **63**, 3233–3241.
